# Supplementary material for: Non-uniform distribution of myosin-mediated forces governs red blood cell membrane curvature through tension modulation
Source: PubMed Central journal article supplement (PMC7274484; doi:10.1371/journal.pcbi.1007890), 2020-05-26
Supplement: pcbi.1007890.s001.pdf [file pcbi.1007890.s001.pdf]

# Supplementary material for “Non-uniform distribution of myosin-mediated forces governs red blood cell membrane curvature through tension modulation”

H. Alimohamadi<sup>1</sup>, A.S. Smith<sup>2</sup>, R.B. Nowak<sup>2</sup>, V.M. Fowler<sup>2,3</sup> and P. Rangamani<sup>1</sup>

<sup>1</sup>Department of Mechanical and Aerospace Engineering, University of California San Diego, California, United states of America

<sup>2</sup>Department of Molecular Medicine, The Scripps Research Institute, La Jolla, California, United states of America

<sup>3</sup>Department of Biological Sciences, University of Delaware, Newark, Delaware, Unites States of America

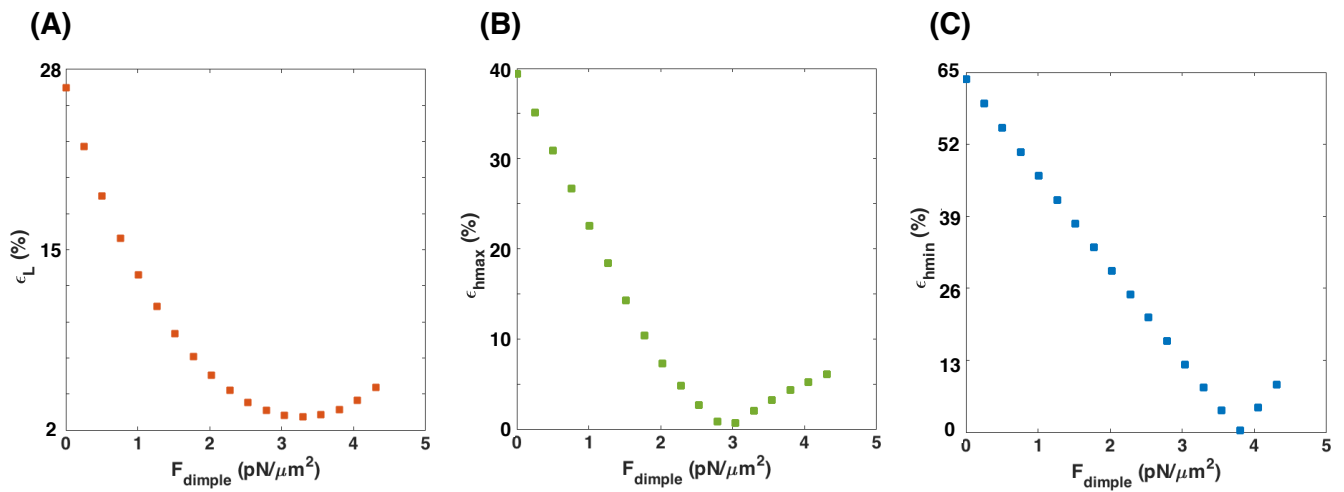

Figure S1: The error in the characteristic lengths is a nonlinear function of dimple force density ( $F_{\text{dimple}}$ ). (A) Calculated error in the maximum length of the simulated RBC ( $\epsilon_L$ ) as a function of  $F_{\text{dimple}}$ . (B) Calculated error in the maximum height of the rim of the simulated RBC ( $\epsilon_{\text{hmax}}$ ) as a function of  $F_{\text{dimple}}$ . (C) Calculated error in the minimum height of the dimple of the simulated RBC ( $\epsilon_{\text{hmin}}$ ) as a function of  $F_{\text{dimple}}$ . In all three graphs, with increasing  $F_{\text{dimple}}$  from zero, initially the error decreases about an order of magnitude and attains a relative minimum. Any further increase in  $F_{\text{dimple}}$  toward the large dimple force density ( $F_{\text{dimple}} > 4\text{pN}/\mu\text{m}^2$ ) leads to a larger error in all characteristic lengths.
