# Supplementary material for: Non-uniform distribution of myosin-mediated forces governs red blood cell membrane curvature through tension modulation
Source: PubMed Central journal article supplement (PMC7274484; doi:10.1371/journal.pcbi.1007890), 2020-05-26
Supplement: pcbi.1007890.s002.pdf [file pcbi.1007890.s002.pdf]

# Supplementary material for “Non-uniform distribution of myosin-mediated forces governs red blood cell membrane curvature through tension modulation”

H. Alimohamadi<sup>1</sup>, A.S. Smith<sup>2</sup>, R.B. Nowak<sup>2</sup>, V.M. Fowler<sup>2,3</sup> and P. Rangamani<sup>1</sup>

<sup>1</sup>Department of Mechanical and Aerospace Engineering, University of California San Diego, California, United states of America

<sup>2</sup>Department of Molecular Medicine, The Scripps Research Institute, La Jolla, California, United states of America

<sup>3</sup>Department of Biological Sciences, University of Delaware, Newark, Delaware, Unites States of America

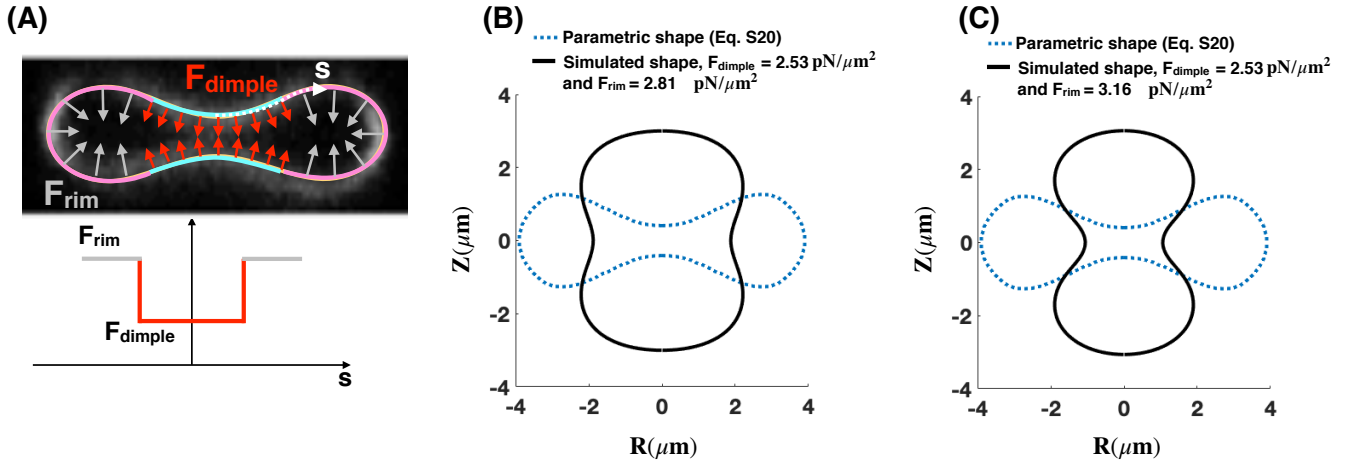

Figure S2: Applying a large pulling force at the rim region causes a very large shape error. (A, upper) Schematic of a biconcave RBC with a small force per unit area (red arrows) at the dimple and a large force per unit area (gray arrows) at the rim section. (A, lower) The applied force along the membrane as a function of the arclength. (B) A comparison between the simulated shape of RBC with  $F_{\text{dimple}} = 2.53 \text{ pN}/\mu\text{m}^2$  and  $F_{\text{rim}} = 2.81 \text{ pN}/\mu\text{m}^2$  and the parametric shape of an RBC. Having a larger force density along the rim region deviates the simulated shape from a biconcave to a peanut- shape geometry. Therefore, the calculated shape error becomes significantly large ( $\epsilon_{\text{total}} \sim 52\%$ ). (C) The parametric shape of an RBC versus the shape that obtained from the simulation with  $F_{\text{dimple}} = 2.53 \text{ pN}/\mu\text{m}^2$  and  $F_{\text{rim}} = 3.16 \text{ pN}/\mu\text{m}^2$ . As the rim force density increases, we found a much larger shape error in the simulated geometry ( $\epsilon_{\text{total}} \sim 91\%$ ).
