# Supplementary material for: Non-uniform distribution of myosin-mediated forces governs red blood cell membrane curvature through tension modulation
Source: PubMed Central journal article supplement (PMC7274484; doi:10.1371/journal.pcbi.1007890), 2020-05-26
Supplement: pcbi.1007890.s006.pdf [file pcbi.1007890.s006.pdf]

# Supplementary material for “Non-uniform distribution of myosin-mediated forces governs red blood cell membrane curvature through tension modulation”

H. Alimohamadi<sup>1</sup>, A.S. Smith<sup>2</sup>, R.B. Nowak<sup>2</sup>, V.M. Fowler<sup>2,3</sup> and P. Rangamani<sup>1</sup>

<sup>1</sup>Department of Mechanical and Aerospace Engineering, University of California San Diego, California, United states of America

<sup>2</sup>Department of Molecular Medicine, The Scripps Research Institute, La Jolla, California, United states of America

<sup>3</sup>Department of Biological Sciences, University of Delaware, Newark, Delaware, Unites States of America

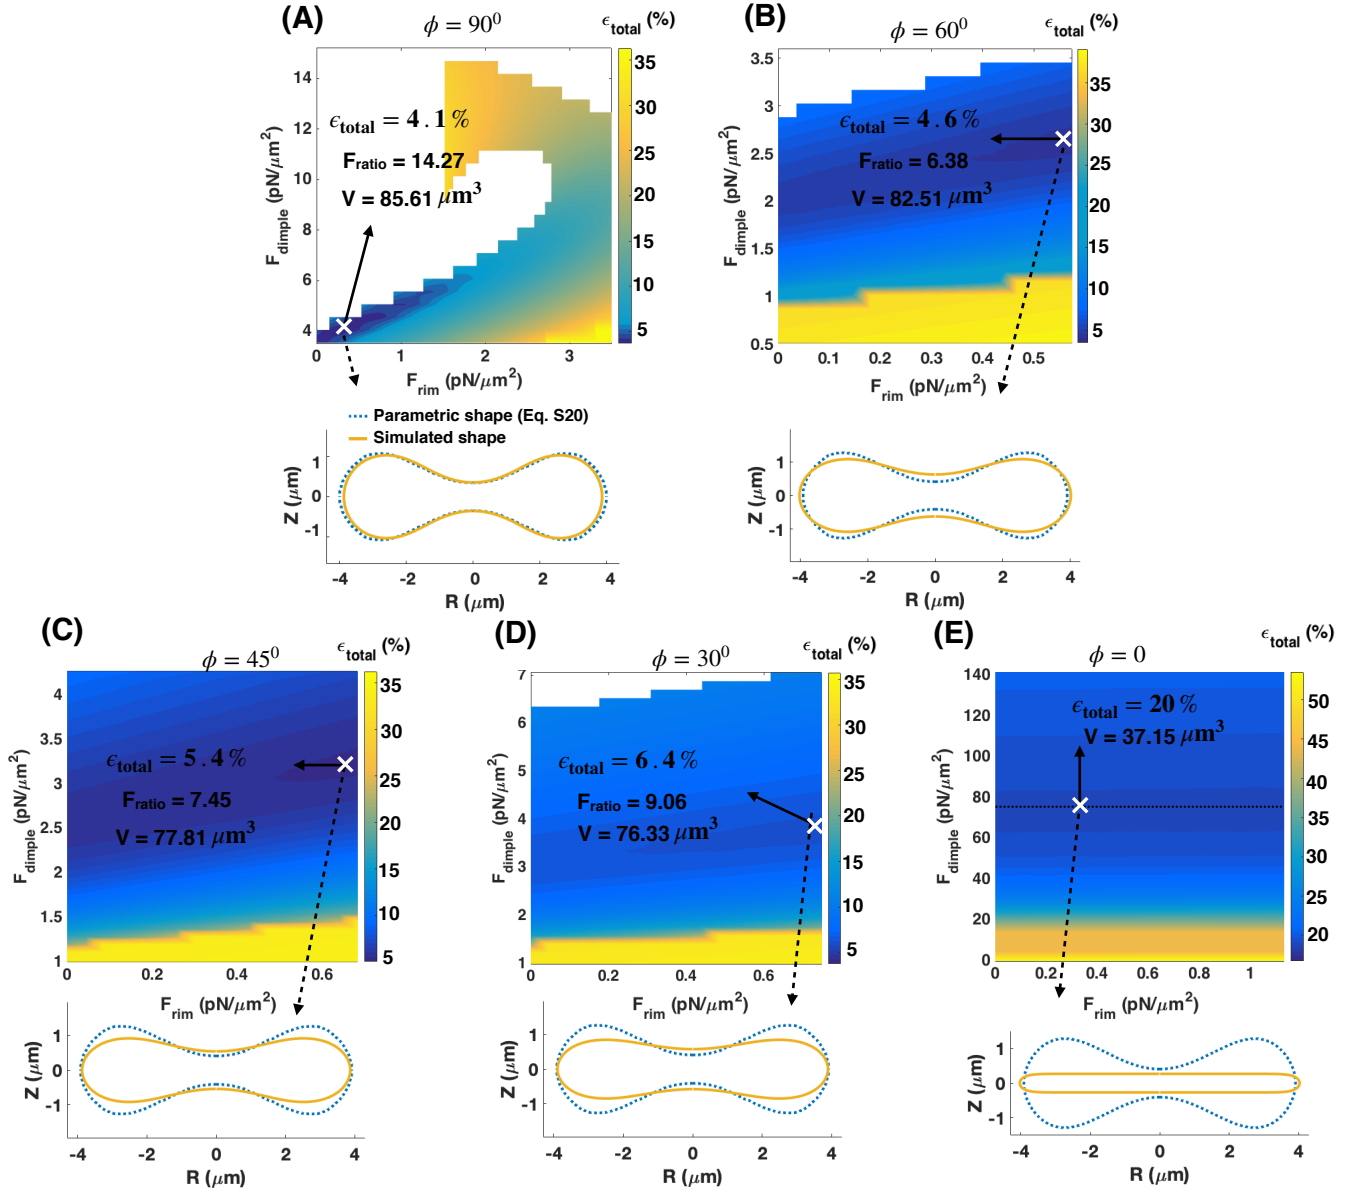

Figure S6: For tensionless membrane (Tension = 0), deviation of the applied forces from normal ( $\phi = 90^\circ$ ) to the tangential orientation ( $\phi = 0$ ) results in the formation of pancake-shaped geometries with large shape error. The Heat maps show the total error in the shape of the simulated RBCs for a range of force densities in the dimple and rim regions. (A) The applied forces are assumed to be normal ( $\phi = 90^\circ$ ). (B) The applied forces make angle  $\phi = 60^\circ$  with the tangent vector  $\mathbf{a}_s$ . (C) The applied forces make angle  $\phi = 45^\circ$  with the tangent vector  $\mathbf{a}_s$ . (D) The applied forces make angle  $\phi = 30^\circ$  with the tangent vector  $\mathbf{a}_s$ . (E) The applied forces are tangent to the membrane surface ( $\phi = 0$ ). In each heat map, the point with the minimum error is marked with 'X'. Also, for each marked point, the volume of the simulated RBC ( $V$ ) is calculated and the shape (solid yellow line) is shown in comparison with the reference parametric (dotted blue line). In the case of tangential forces ( $\phi = 0$ ), the shape error is independent of the magnitude of the rim force density ( $F_{\text{rim}}$ ).
