# Supplementary material for: Non-uniform distribution of myosin-mediated forces governs red blood cell membrane curvature through tension modulation
Source: PubMed Central journal article supplement (PMC7274484; doi:10.1371/journal.pcbi.1007890), 2020-05-26
Supplement: pcbi.1007890.s010.pdf [file pcbi.1007890.s010.pdf]

# Supplementary material for “Non-uniform distribution of myosin-mediated forces governs red blood cell membrane curvature through tension modulation”

H. Alimohamadi<sup>1</sup>, A.S. Smith<sup>2</sup>, R.B. Nowak<sup>2</sup>, V.M. Fowler<sup>2,3</sup> and P. Rangamani<sup>1</sup>

<sup>1</sup>Department of Mechanical and Aerospace Engineering, University of California San Diego, California, United States of America

<sup>2</sup>Department of Molecular Medicine, The Scripps Research Institute, La Jolla, California, United States of America

<sup>3</sup>Department of Biological Sciences, University of Delaware, Newark, Delaware, United States of America

Table 1: Notation used in the model

| Notation               | Description                                                                 | Units               |
|------------------------|-----------------------------------------------------------------------------|---------------------|
| $p$                    | Pressure difference across the membrane                                     | pN/nm <sup>2</sup>  |
| $\theta^\alpha$        | The surface coordinate ( $\alpha \in \{1,2\}$ )                             |                     |
| $W$                    | Local energy per unit area                                                  | pN/nm               |
| $E$                    | Total surface energy                                                        | pN·nm               |
| $E_b$                  | Bending energy                                                              | pN·nm               |
| $E_f$                  | Work done by forces                                                         | pN·nm               |
| $\mathbf{r}$           | Position vector                                                             |                     |
| $\mathbf{n}$           | Normal unit vector to the membrane surface                                  | unit vector         |
| $\mathbf{a}_s$         | Tangent unit vector on the membrane surface                                 | unit vector         |
| $\boldsymbol{\nu}$     | Tangent vector to the membrane surface in direction of increasing arclength | unit vector         |
| $\boldsymbol{\tau}$    | Rightward normal in direction of revolution                                 | unit vector         |
| $\mathbf{a}_\xi$       | Basis vectors describing the tangent plane                                  |                     |
| $\lambda$              | Membrane tension                                                            | pN/nm               |
| $H$                    | Mean curvature of the membrane                                              | 1/nm                |
| $K$                    | Gaussian curvature of the membrane                                          | 1/nm <sup>2</sup>   |
| $F$                    | Normally applied force per unit area                                        | pN/ $\mu\text{m}^2$ |
| $\kappa_\nu$           | Tangential curvature                                                        | 1/nm                |
| $\kappa_\tau$          | Transverse curvature                                                        | 1/nm                |
| $\kappa$               | Bending modulus                                                             | pN · nm             |
| $\kappa_G$             | Gaussian modulus                                                            | pN · nm             |
| $s$                    | Arclength                                                                   | nm                  |
| $\theta$               | Azimuthal angle                                                             |                     |
| $\psi$                 | Angle between $\mathbf{e}_r$ and $\mathbf{a}_s$                             |                     |
| $R$                    | Radial distance                                                             | nm                  |
| $Z$                    | Elevation from base plane                                                   | nm                  |
| $\mathbf{e}_r(\theta)$ | Radial basis vector                                                         | unit vector         |
| $\mathbf{e}_\theta$    | Azimuthal basis vector                                                      | unit vector         |
| $\mathbf{k}$           | Altitudinal basis vector                                                    | unit vector         |
| $A$                    | Membrane area                                                               | nm <sup>2</sup>     |
| $s_{max}$              | Maximum arclength                                                           | nm                  |
| $h_{max}$              | Maximum height at the rim                                                   |                     |
| $h_{min}$              | Minimum height at the dimple                                                |                     |
| $L$                    | The maximum cell diameter                                                   |                     |
| $\epsilon_{hmax}$      | Error in the maximum height                                                 |                     |
| $\epsilon_{hmin}$      | Error in the minimum height                                                 |                     |
| $\epsilon_L$           | Error in the length                                                         |                     |
| $\epsilon_{total}$     | Total error                                                                 |                     |
| $M$                    | Shape equation variable                                                     | 1/nm                |
