# Supplementary material for: Non-uniform distribution of myosin-mediated forces governs red blood cell membrane curvature through tension modulation
Source: PubMed Central journal article supplement (PMC7274484; doi:10.1371/journal.pcbi.1007890), 2020-05-26
Supplement: pcbi.1007890.s011.pdf [file pcbi.1007890.s011.pdf]

# Supplementary material for “Non-uniform distribution of myosin-mediated forces governs red blood cell membrane curvature through tension modulation”

H. Alimohamadi<sup>1</sup>, A.S. Smith<sup>2</sup>, R.B. Nowak<sup>2</sup>, V.M. Fowler<sup>2,3</sup> and P. Rangamani<sup>1</sup>

<sup>1</sup>Department of Mechanical and Aerospace Engineering, University of California San Diego, California, United States of America

<sup>2</sup>Department of Molecular Medicine, The Scripps Research Institute, La Jolla, California, United States of America

<sup>3</sup>Department of Biological Sciences, University of Delaware, Newark, Delaware, United States of America

Table 2: Notation used in the model

| Notation             | Description                                            | Units               |
|----------------------|--------------------------------------------------------|---------------------|
| $R_0$                | Radius of the RBC cell                                 | nm                  |
| $\kappa_0$           | Bending rigidity of the lipid                          | pN                  |
| $F_{\text{uniform}}$ | Uniformly applied force                                | pN/ $\mu\text{m}^2$ |
| $F_{\text{dimple}}$  | Local force at dimple region                           | pN/ $\mu\text{m}^2$ |
| $F_{\text{rim}}$     | Local force at rim region                              | pN/ $\mu\text{m}^2$ |
| $A_{\text{dimple}}$  | Membrane surface are in the dimple region              | $\text{m}^2$        |
| $A_{\text{rim}}$     | Membrane surface are in the rim region                 | $\text{m}^2$        |
| $V_{\text{dimple}}$  | Occupied volume by the dimple region                   | $\text{m}^3$        |
| $V_{\text{rim}}$     | Occupied volume by the rim region                      | $\text{m}^3$        |
| $r$                  | Dimensionless radial distance                          |                     |
| $z$                  | Dimensionless height                                   |                     |
| $h$                  | Dimensionless mean curvature                           |                     |
| $m$                  | Dimensionless M                                        |                     |
| $\tilde{\lambda}$    | Dimensionless surface tension                          |                     |
| $\tilde{p}$          | Dimensionless pressure                                 |                     |
| $\tilde{\mathbf{f}}$ | Dimensionless force                                    |                     |
| $\tilde{\kappa}$     | Dimensionless bending modulus                          |                     |
| $t$                  | Dimensionless arclength                                |                     |
| $F_{\text{ratio}}$   | Ratio of the force at the dimple versus the rim region |                     |
